# Supplementary material for: Low Neonatal Mortality and High Incidence of Infectious Diseases in a Vietnamese Province Hospital
Source: Hindawi journal article supplement (doi:10.1155/2016/2087042), 2016-01-01
Supplement: f1 [file 2087042.f1.pdf]

## APPENDIX I: NEONATAL ADMISSION DATA REGISTRATION

To be completed for all infants <29 days of age at admission

A) Informed consent by family Y/N/not asked Date \_\_\_/\_\_\_/200\_\_

### B) Basic data

- 1) Completed by doctor: \_\_\_\_\_, OBS/NICU/PED
- 2) Mothers name: \_\_\_\_\_
- 3) Filed out with: mother/other/none/orphan Contact (name/tel): \_\_\_\_\_
- 4) Admission day: \_\_\_/\_\_\_/200\_\_ and hour: \_\_\_\_\_ (administration time)
- 5) Birth date: \_\_\_/\_\_\_/200\_\_ and hour: \_\_\_\_\_
- 6) Birth weight: \_\_\_\_\_ (g) Gender: M/F GA: \_\_\_ (weeks) Term/preterm/post term

### C) Neonatal period (prior to present admission to DTH)

- 1) Feeding: Breast milk/formula/not started Breast feeding/bottle/NG-tube
- 2) If birth weight < 2000 g; kangaroo-mother-care performed: Y/N
- 3) Vaccinations: BCG Y/N Enderix Y/N
- 4) Duration of symptoms \_\_\_\_\_ (days from first symptom, according to family or referral letter)
- 5) Specification of symptoms (more options can be tagged):  
Floppy/difficult to wake up/movement only when stimulated/fever/difficulties  
breathing/difficulties eating/convulsions/skin colour yellow or blue or pale/  
cord surroundings wet or red/abnormal stool/distended belly/ other: \_\_\_\_\_
- 6) Discharged after delivery: Y/N
- 7) Seen at HCF prior to present admission: Y/N If Y; No of contacts: \_\_\_; for each specify:  

| Level | OPD/adm | Date(s) | Diagnoses | Treatment |
|-------|---------|---------|-----------|-----------|
|-------|---------|---------|-----------|-----------|

### D) DTH reception (present admission)

- 1) Admitted from: home/OBS/HCF If HCF; Referral report: Y/N HCF Name: \_\_\_\_\_  
Level: Health centre/district hospital/province hospital/private hospital
- 2) If from home/HCF; Transport; Duration: \_\_\_ (h) Distance: \_\_\_ (km)  
Mode: walking/motor/car/amb  
*Only if ambulance, fill out; Accompanied by: family/nurse/doctor/none*  
Evaluation by: accompanying staff/family/DTH;  
Equipment in use: incubator/air/oxygen/bag ventilation/ET tube/NG  
tube/suction/iv/infusion pump/monitor (spO2/HR)/none/others: \_\_\_\_\_  
Equipment failure/incorrect use/displace: Y/N If Y; Specify: \_\_\_\_\_  
Deterioration of patient: Y/N If Y; Specify: \_\_\_\_\_  
Stabilisation attempt: Y/N If Y; Specify: \_\_\_\_\_
- 3) Admission (from home/other HCF/obstetrics) to: NICU/PED
- 4) Evaluation at admission (by first doctor receiving the patient), time: \_\_\_\_\_  
Weight: \_\_\_\_\_ (g) T<sup>0</sup> \_\_\_ RR: \_\_\_ HR: \_\_\_ SpO2: \_\_\_/FiO2  
Pink/blue/pale/jaundice Irritable Y/N Alert/lethargy/coma Grunting: Y/N  
Chest indrawing: no/moderate/severe Fontanel: normal/bulging/sunken  
Pulse: normal/weak CRT: normal/prolonged Other signs: \_\_\_\_\_  
Diagnoses: \_\_\_\_\_

Treatment: Respiratory support Y/N, If Y oxy/CPAP/ENT/bagging Vitamin K Y/N  
Circulation support Y/N, If Y: volume/pressor/chest compression  
Antibiotics: Y/N Other: \_\_\_\_\_

**E) Demography**

- 1) Mother's age: \_\_\_\_\_ (year of birth)
- 2) Mother's education (completed): ≤5 gr/6-12 gr/> 12 gr
- 3) Father's education (completed): ≤5 gr/6-12 gr/> 12 gr
- 4) Both parents and newborn living together: Y/N
- 5) Current address (according to family): village/town/city Province: \_\_\_\_\_
- 6) Ethnic minority (father/mother non Kinh): Y/N If Y, specify: \_\_\_\_\_

**F) Mother**

- 1) Weight (prior to pregnancy): \_\_\_\_\_ (kg)
- 2) Chronic diseases: Y/N If Y; specify \_\_\_\_\_
- 3) *Other* pregnancies; abortions (spontaneous): \_\_\_\_ (no) Stillbirths: \_\_\_\_ (no)  
Livebirths: \_\_ Dead (after birth): Y/N If Y; age and cause: \_\_\_\_\_

**G) Pregnancy**

- 1) ANC visits: <3/≥ 3; trimester I \_\_\_\_ / II \_\_\_\_ / III \_\_\_\_ (no)  
Tetanus booster: 1 / 2 / no Iron supplement: Y/N Ultrasound: Y/N If Y;  
Abnormal findings: Y/N If Y; specify \_\_\_\_\_
- 2) Illness/complication: Y/N If Y: fever/UTI/vaginal bleeding/pre-eclampsia/others  
If others, specify: \_\_\_\_\_
- 3) Treatment (during pregnancy, besides iron): Y/N If Y; specify: \_\_\_\_\_

**H) Delivery**

- 1) Birth place: home/public HCF/private HCF  
If public HCF: health centre/district hospital/province hospital/regional hospital
- 2) Birth assistance: No professional assistance/TBA/midwife/doctor
- 3) Normal delivery: Y/N (according to family and file) *Only if N, fill out*;  
Prolonged labour (>18h): Y/N  
Meconium stained amniotic fluid: Y/N  
Premature membrane rupture (>18h): Y/N If Y; antibiotics Y/N  
Premature labour: Y/N If Y corticosteroid: Y/N  
Breech: Y/N  
Multiple: Y/N  
Delivery mode: normal/vacuum extraction/forceps/caesarean section  
If Caesarean; Planned/acute +/% contractions Indication: \_\_\_\_\_
- 4) Resuscitation (immediately after delivery): Y/N, if Y;  
Bag-ventilation: Y/N Intubation: Y/N Chest compression: Y/N
- 5) Cry after birth Y/N Apgar score: \_\_ /1 min, \_\_ /5 min, \_\_ / \_\_ min, \_\_ / \_\_ min
- 6) Vitamin K (im): Y/N Other treatment (at delivery ) Y/N  
If Y, specify: \_\_\_\_\_
- 7) Maternal complication: Y/N If Y; Abnormal bleeding intra/post partum/others  
If others; Specify: \_\_\_\_\_ Treatment: \_\_\_\_\_

**APPENDIX II: POTENTIAL RISK FACTORS REGISTERED IN THE STUDY**

| <b>1.Socio-demographic</b> | <b>2.Pregnancy-delivery</b>     | <b>3.Neonatal period</b>      |
|----------------------------|---------------------------------|-------------------------------|
| Ethnic minority            | Number of antenatal care visits | Discharge after birth         |
| Mother's education         | Delivery place                  | Admitted from                 |
| Father's education         | Twin pregnancy                  | Symptom duration              |
| Number of siblings         | Normal delivery                 | Type of feeding               |
| <b>4.Admission status</b>  | Mode of delivery                | Difficulties eating           |
| Ambulance transport        | Cry after birth                 | Difficult to wake up          |
| Admission ward             | Resuscitation                   | Movement only when stimulated |
| Age at admission           | Vitamin K                       | Convulsions                   |
| Skin color                 | BCG                             | Difficulties breathing        |
| Temperature                | Engerix B                       | Skin color change             |
| Severe respiratory failure | Gender                          | Abnormal stool                |
| Shock                      | Birth weight                    |                               |
| CNS trouble                | Gestational age                 |                               |

**APPENDIX III: DELIVERIES IN OBSTETRIC DEPARTMENT OF DONG THAP HOSPITAL**

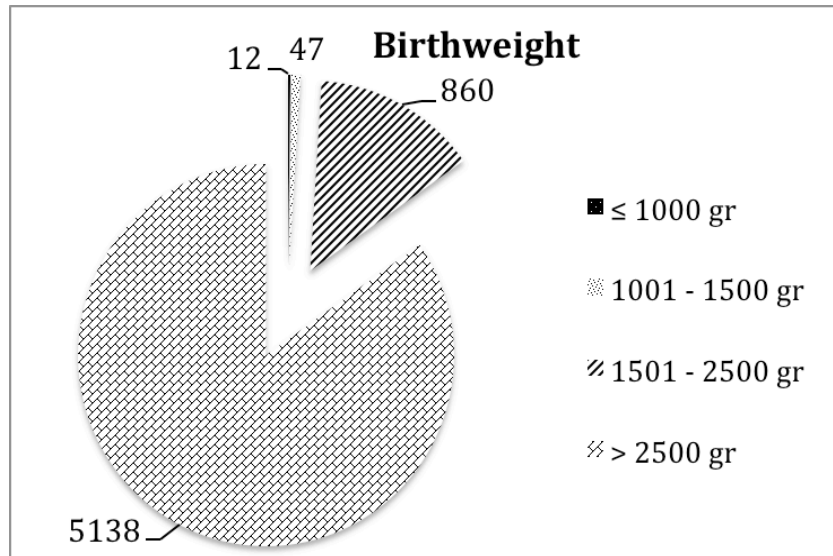

During the study period, the Obstetrics department had 6057 live births, approximately a quarter of total live births in Dong Thap province: 15.2% LBW and 1% VLBW.

## APPENDIX IV: DESCRIPTION OF POTENTIAL RISK FACTORS

| <b>Characteristics of socio - demographics</b> |              | <b>No of cases (%)</b> |
|------------------------------------------------|--------------|------------------------|
| Ethnic minority                                | Yes          | 17 (1.6)               |
|                                                | No           | 1055 (96.4)            |
|                                                | UK / miss    | 22 (2.0)               |
| Mother's education                             | ≤ class 5    | 293 (26.8)             |
|                                                | Class 6 – 12 | 661 (60.4)             |
|                                                | > Class 12   | 115 (10.5)             |
|                                                | UK / miss    | 25 (2.3)               |
| Father's education                             | ≤ Class 5    | 255 (23.3)             |
|                                                | Class 6 – 12 | 671 (61.3)             |
|                                                | > Class 12   | 142 (13.0)             |
|                                                | UK / miss    | 26 (2.4)               |
| Number of siblings                             | 0            | 630 (57.7)             |
|                                                | 1            | 332 (30.3)             |
|                                                | 2 – 4        | 92 (8.4)               |
|                                                | UK / miss    | 40 (3.6)               |

| <b>Characteristics of pregnancy- delivery</b> |             | <b>No of cases (%)</b> |
|-----------------------------------------------|-------------|------------------------|
| Number of antenatal care visits               | < 3         | 145 (13.3)             |
|                                               | ≥ 3         | 906 (82.8)             |
|                                               | UK / miss   | 43 (3.9)               |
| Delivery place                                | Public HCF  | 1051 (96.1)            |
|                                               | Private HCF | 20 (1.8)               |
|                                               | Home        | 9 (0.8)                |
|                                               | UK / Miss   | 14 (1.3)               |
| Twin pregnancy                                | Yes         | 30 (2.7)               |
|                                               | No          | 923 (84.4)             |
|                                               | UK / miss   | 141 (12.9)             |
| Normal delivery                               | Yes         | 521 (47.6)             |
|                                               | No          | 542 (49.5)             |
|                                               | UK / miss   | 30 (2.7)               |
| Mode of delivery                              | Normal      | 780 (71.3)             |
|                                               | Cesarean    | 277 (25.3)             |
|                                               | UK / miss   | 37 (3.4)               |
| Cry after birth                               | Yes         | 949 (86.7)             |
|                                               | No          | 124 (11.3)             |
|                                               | UK / miss   | 21 (2.0)               |
| Resuscitation                                 | Yes         | 41 (3.7)               |
|                                               | No          | 1028 (94.0)            |
|                                               | UK / miss   | 25 (2.3)               |
| Vitamin K                                     | Yes         | 1034 (94.5)            |
|                                               | No          | 39 (3.6)               |
|                                               | UK / miss   | 21 (1.9)               |

|                 |               |            |
|-----------------|---------------|------------|
| BCG             | Yes           | 516 (47.2) |
|                 | No            | 572 (52.3) |
|                 | UK / miss     | 6 (0.6)    |
| Engerix         | Yes           | 339 (31.0) |
|                 | No            | 736 (67.3) |
|                 | UK / miss     | 19 (1.7)   |
| Gender          | Male          | 606 (55.4) |
|                 | Female        | 488 (44.6) |
| Birth weight    | ≤ 1000 g      | 15 (1.4)   |
|                 | < 1500 g      | 41 (3.7)   |
|                 | < 2500 g      | 277 (25.3) |
|                 | ≥ 2500 g      | 755 (69.0) |
|                 | UK / miss     | 6 (0.6)    |
| Gestational age | < 28 weeks    | 16 (1.5)   |
|                 | 28 – 31 weeks | 59 (5.4)   |
|                 | 32 – 36 weeks | 196 (17.9) |
|                 | ≥ 37 weeks    | 771 (70.5) |
|                 | UK / miss     | 52 (4.8)   |

| <b>Characteristics of neonatal period</b> |              | <b>No of cases (%)</b> |
|-------------------------------------------|--------------|------------------------|
| Discharge after birth                     | Yes          | 426 (38.9)             |
|                                           | No           | 654 (59.8)             |
|                                           | UK / miss    | 14 (1.3)               |
| Admitted from                             | Home         | 412 (37.7)             |
|                                           | HCF          | 152 (13.9)             |
|                                           | OBS          | 527 (48.2)             |
|                                           | UK / miss    | 3 (0.3)                |
| Symptoms duration                         | ≤ 1 day      | 669 (61.2)             |
|                                           | > 1 day      | 418 (38.2)             |
|                                           | UK / miss    | 7 (0.6)                |
| Type of feeding                           | Breast milk  | 484 (44.2)             |
|                                           | Formula milk | 85 (7.8)               |
|                                           | Mix          | 223 (20.4)             |
|                                           | Not start    | 285 (26.1)             |
|                                           | UK / miss    | 17 (1.6)               |
| Difficulties feeding                      |              | 123 (11.2)             |
| Difficult to wake up                      |              | 3 (0.3)                |
| Movement only when stimulated             |              | 6 (0.5)                |
| Convulsions                               |              | 9 (0.8)                |
| Difficulties breathing                    |              | 190 (17.4)             |
| Skin color change                         | Yellow       | 297 (27.1)             |
|                                           | Blue         | 56 (5.1)               |
|                                           | Pale         | 2 (0.2)                |
| Abnormal stool                            |              | 9 (0.8)                |

| Characteristics of admission status |                 | No of cases (%) |
|-------------------------------------|-----------------|-----------------|
| Ambulance transport                 | Yes             | 136 (12.4)      |
|                                     | No              | 935 (85.5)      |
|                                     | UK / miss       | 23 (2.1)        |
| Admission ward                      | PICU            | 660 (60.3)      |
|                                     | Pediatric Dep.  | 416 (38.1)      |
|                                     | UK / miss       | 18 (1.6)        |
| Age at admission                    | 1 day           | 327 (29.9)      |
|                                     | 2 – 7 days      | 376 (34.4)      |
|                                     | 8 – 28 days     | 369 (33.7)      |
|                                     | UK / miss       | 22 (2.0)        |
| Skin color                          | Pink            | 474 (43.3)      |
|                                     | Yellow          | 454 (41.5)      |
|                                     | Cyanosis        | 113 (10.3)      |
|                                     | Pale            | 45 (4.1)        |
|                                     | UK / miss       | 8 (0.7)         |
| Temperature                         | 34 – 35.9°C     | 6 (0.5)         |
|                                     | 36 – 38°C       | 986 (90.1)      |
|                                     | > 38°C          | 93 (8.5)        |
|                                     | UK / miss       | 9 (0.8)         |
| Severe respiratory failure          | Yes             | 22 (2.0)        |
|                                     | No              | 1072 (98.0)     |
| Shock                               | Yes             | 26 (2.4)        |
|                                     | No              | 1068 (97.6)     |
| CNS trouble                         | Lethargy / coma | 59 (5.4)        |
|                                     | No              | 1035 (94.6)     |

| Characteristics of socio-demographics | Cases (%)<br>N = 1094 | Death (%)<br>N = 50 | OR (95% CI)             |
|---------------------------------------|-----------------------|---------------------|-------------------------|
| Ethnic minority                       |                       |                     |                         |
| Kinh                                  | 1055 (96,4)           | 50 (100)            | 1.0 (NA)                |
| Others                                | 17 (1,6)              | 0 (0)               | -                       |
| Mother's education                    |                       |                     |                         |
| ≤ Class 5                             | 293 (26,8)            | 17 (34,0)           | 1.25 (0.68-2.30)        |
| Class 6 – 12                          | 661 (60,4)            | 31 (62,0)           | 1.0 (NA)                |
| > Class 12                            | 115 (10,5)            | 0 (0)               | -                       |
| Father's education                    |                       |                     |                         |
| ≤ Class 5                             | 167 (15,3)            | 20 (40,0)           | <b>3.52</b> (1.90-6.49) |
| Class 6 – 12                          | 646 (59,0)            | 25 (50,0)           | 1.0 (NA)                |
| > Class 12                            | 142 (13,0)            | 2 (4,0)             | 0.37 (0.09-1.58)        |
| Number of siblings                    |                       |                     |                         |
| < 2 childs                            | 962 (87,9)            | 42 (84,0)           | 1.0 (NA)                |
| ≥ 2 childs                            | 92 (8,4)              | 6 (12,0)            | 1.53 (0.63-3.70)        |

| <b>Characteristics of pregnancy-delivery</b> | <b>Cases (%)<br/>N = 1094</b> | <b>Death (%)<br/>N = 50</b> | <b>OR (95% CI)</b>           |
|----------------------------------------------|-------------------------------|-----------------------------|------------------------------|
| ANC visits                                   |                               |                             |                              |
| < 3                                          | 145 (13.3)                    | 16 (32.0)                   | <b>3.50</b> (1.86-6.57)      |
| ≥ 3                                          | 906 (82.8)                    | 31 (62.0)                   | 1.0 (NA)                     |
| Normal delivery                              |                               |                             |                              |
| Yes                                          | 521 (47.6)                    | 8 (16.0)                    | 1.0 (NA)                     |
| No                                           | 542 (49.5)                    | 42 (84.0)                   | <b>5.38</b> (2.51-11.63)     |
| Multiple pregnancy                           |                               |                             |                              |
| Yes                                          | 30 (2.7)                      | 1 (2.0)                     | 0.63 (0.84-4.71)             |
| No                                           | 923 (84.4)                    | 48 (96.0)                   | 1.0 (NA)                     |
| Delivery place                               |                               |                             |                              |
| Health care facility                         | 1071 (97.9)                   | 47 (94.0)                   | 1.0 (NA)                     |
| Home                                         | 9 (0.8)                       | 3 (6.0)                     | <b>10.89</b> (2.64-44.91)    |
| Delivery mode                                |                               |                             |                              |
| Normal delivery                              | 780 (71.3)                    | 37 (74.0)                   | 1.0 (NA)                     |
| Assisted delivery                            | 25 (2.3)                      | 2 (4.0)                     | 1.75 (0.40-7.69)             |
| Cesarean delivery                            | 277 (25.3)                    | 11 (22.0)                   | 0.83 (0.42-1.65)             |
| Cry after birth                              |                               |                             |                              |
| Yes                                          | 949 (86.7)                    | 19 (38.0)                   | 1.0 (NA)                     |
| No                                           | 124 (11.3)                    | 31 (62.0)                   | <b>16.32</b> (8.87-30.01)    |
| GA                                           |                               |                             |                              |
| < 28 weeks                                   | 16 (1.5)                      | 6 (12.0)                    | <b>65.96</b> (21.74-200.00)  |
| 28 – 31 weeks                                | 59 (5.4)                      | 13 (26.0)                   | <b>11.19</b> (5.21-23.81)    |
| 32 – 36 weeks                                | 196 (17.9)                    | 4 (8.0)                     | 0.82 (0.28-2.45)             |
| ≥ 37 weeks                                   | 771 (70.5)                    | 19 (38.0)                   | 1.0 (NA)                     |
| BW                                           |                               |                             |                              |
| ≤ 1000 gr                                    | 15 (1.4)                      | 11 (22.0)                   | <b>145.55</b> (41.67-500.00) |
| 1001 - 1499 gr                               | 41 (3.7)                      | 11 (22.0)                   | <b>19.40</b> (8.13-45.45)    |
| 1500 - 2499 gr                               | 277 (25.3)                    | 13 (26.0)                   | <b>2.61</b> (1.21-5.62)      |
| ≥ 2500gr                                     | 755 (69.0)                    | 14 (28.0)                   | 1.0 (NA)                     |
| Gender                                       |                               |                             |                              |
| Male                                         | 606 (55.4)                    | 29 (58.0)                   | 1.0 (NA)                     |
| Female                                       | 488 (44.6)                    | 21 (42.0)                   | 0.89 (0.50-1.59)             |



| Characteristics of neonatal period | Cases (%)<br>N = 1094 | Death (%)<br>N = 50 | OR (95% CI)                |
|------------------------------------|-----------------------|---------------------|----------------------------|
| Engerix B                          |                       |                     |                            |
| Yes                                | 339 (31.0)            | 1 (2.0)             | 1.0 (NA)                   |
| No                                 | 736 (67.3)            | 49 (98.0)           | <b>24.11</b> (3.31-175.33) |
| BCG                                |                       |                     |                            |
| Yes                                | 516 (47.2)            | 1 (2.0)             | 1.0 (NA)                   |
| No                                 | 572 (52.3)            | 49 (98.0)           | <b>48.25</b> (6.64-350.73) |
| Vitamin K1                         |                       |                     |                            |
| Yes                                | 1034 (94.5)           | 42 (84.0)           | 1.0 (NA)                   |
| No                                 | 39 (3.6)              | 8 (16.0)            | <b>6.10</b> (2.64-14.07)   |
| Feeding                            |                       |                     |                            |
| Mother milk                        | 484 (44.2)            | 9 (18.0)            | 1.0 (NA)                   |
| Formula milk                       | 85 (7.8)              | 2 (4.0)             | 1.27 (0.27-5.99)           |
| Mix                                | 223 (20.4)            | 0 (0)               | -                          |
| Not started                        | 285 (26.1)            | 39 (78.0)           | <b>8.37</b> (3.98-17.54)   |
| Discharge after birth              |                       |                     |                            |
| Yes                                | 426 (38.9)            | 3 (6.0)             | 1.0 (NA)                   |
| No                                 | 654 (59.8)            | 47 (94.0)           | <b>10.92</b> (3.38-35.31)  |
| Symptoms duration                  |                       |                     |                            |
| ≤ 1 days                           | 669 (61.2)            | 49 (98.0)           | 1.0 (NA)                   |
| > 1 day                            | 418 (38.2)            | 1 (2.0)             | <b>0.03</b> (0.00-0.22)    |
| Difficult to wake up               |                       |                     |                            |
| Yes                                | 3 (0.3)               | 2 (4.0)             | <b>43.46</b> (3.87-487.67) |
| No                                 | 1091 (99.7)           | 48 (96.0)           | 1.0 (NA)                   |
| Difficulties eating                |                       |                     |                            |
| Yes                                | 123 (11.2)            | 7 (14.0)            | 1.30 (0.57-2.96)           |
| No                                 | 971 (88.8)            | 43 (86.0)           | 1.0 (NA)                   |
| Movement when stimulated           |                       |                     |                            |
| Yes                                | 6 (0.5)               | 1 (2.0)             | 4.24 (0.49-37.00)          |
| No                                 | 1088 (99.5)           | 49 (98.0)           | 1.0 (NA)                   |
| Convulsions                        |                       |                     |                            |
| Yes                                | 9 (0.8)               | 1 (2.0)             | 2.64 (0.32-21.55)          |
| No                                 | 1085 (99.2)           | 49 (98.0)           | 1.0 (NA)                   |
| Difficulties breathing             |                       |                     |                            |
| Yes                                | 190 (17.4)            | 32 (64.0)           | <b>9.97</b> (5.46-18.20)   |
| No                                 | 904 (82.6)            | 18 (36.0)           | 1.0 (NA)                   |
| Skin color changed                 |                       |                     |                            |
| Yes                                | 351 (32.1)            | 18 (36.0)           | 1.20 (0.66-2.17)           |
| No                                 | 743 (67.9)            | 32 (64.0)           | 1.0 (NA)                   |
| Abnormal stools                    |                       |                     |                            |
| Yes                                | 9 (0.8)               | 0 (0)               | -                          |
| No                                 | 1085 (99.2)           | 50 (100)            | 1.0 (NA)                   |
| Transport time                     |                       |                     |                            |
| Internal                           | 527 (48.2)            | 34 (68.0)           | 1.0 (NA)                   |
| External                           | 567 (51.8)            | 16 (32.0)           | <b>0.42</b> (0.23-0.77)    |

| <b>Characteristics of admission status</b> | <b>Cases (%)<br/>N = 1094</b> | <b>Death (%)<br/>N = 50</b> | <b>OR (95% CI)</b>         |
|--------------------------------------------|-------------------------------|-----------------------------|----------------------------|
| Age at admission                           |                               |                             |                            |
| 0 – 1 day                                  | 424 (38.8)                    | 45 (90.0)                   | 1.0 (NA)                   |
| 2 – 6 days                                 | 279 (34.6)                    | 4 (8.0)                     | <b>0.12</b> (0.04-0.35)    |
| 8 – 28 days                                | 369 (33.7)                    | 1 (2.0)                     | 0.023 (0.003-0.17)         |
| Skin color                                 |                               |                             |                            |
| Pink                                       | 474 (43.3)                    | 12 (24.0)                   | 1.0 (NA)                   |
| Yellow                                     | 454 (41.5)                    | 1 (2.0)                     | <b>0.09</b> (0.01-0.66)    |
| Cyanosis                                   | 113 (10.3)                    | 30 (60.0)                   | <b>13.92</b> (6.85-28.29)  |
| Pale                                       | 45 (4.1)                      | 6 (12.0)                    | <b>5.92</b> (2.11-16.64)   |
| Temperature                                |                               |                             |                            |
| 34 – 35.9°C                                | 6 (0.5)                       | 2 (4.0)                     | <b>10.70</b> (1.91-58.82)  |
| 36 – 38°C                                  | 986 (90.1)                    | 44 (88.0)                   | 1.0 (NA)                   |
| > 38°C                                     | 93 (8.5)                      | 4 (8.0)                     | 0.96 (0.34-2.74)           |
| Severe respiratory failure                 |                               |                             |                            |
| Yes                                        | 22 (2.0)                      | 10 (20.0)                   | <b>21.50</b> (8.77-52.71)  |
| No                                         | 1072 (98.0)                   | 40 (80.0)                   | 1.0 (NA)                   |
| Shock                                      |                               |                             |                            |
| Yes                                        | 26 (2.4)                      | 14 (28.0)                   | <b>33.44</b> (14.44-77.44) |
| No                                         | 1068 (97.6)                   | 36 (72.0)                   | 1.0 (NA)                   |
| CNS trouble                                |                               |                             |                            |
| Lethargy or coma                           | 59 (5.4)                      | 23 (46.0)                   | <b>23.85</b> (12.48-45.60) |
| No                                         | 1035 (94.6)                   | 27 (54.0)                   | 1.0 (NA)                   |
